# Supplementary material
Source: publisher site journal article supplement (https://www.dovepress.com/article/241971)
Supplement: Supplementary file 1 [file get_supplementary_file.php]

## Supplementary

# A radio-nano-platform for T1/T2 dual mode PET-MR imaging

Yaser Hadi Gholami, Hushan Yuan, Moses Q. Wilks, Richard Maschmeyer, Marc D. Normandin, Lee Josephson, Georges El Fakhri, Zdenka Kuncic

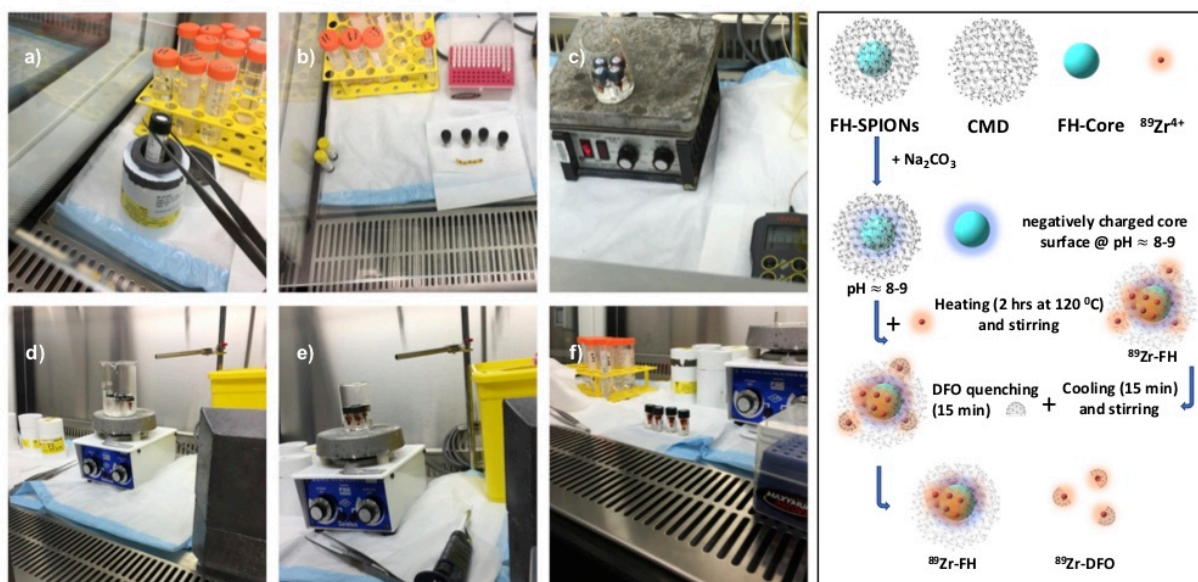

**Figure S1.** Experimental procedure for [ $^{89}\text{Zr}$ ]Zr-FH radiolabeling. **a)** [ $^{89}\text{Zr}$ ]Zr-oxalate batch; **b)** preparation of reaction mixtures; **c)** heating and stirring reaction mixtures; **d,e,f)** cooling and quenching reaction mixtures. Right panel – schematic of the HIR process.

**Abbreviations:** FH, Feraheme; SPION, superparamagnetic iron oxide nanoparticle; CMD, carboxymethyl dextran coating; DFO, deferoxamine mesylate salt; HIR, heat induced radiolabeling.

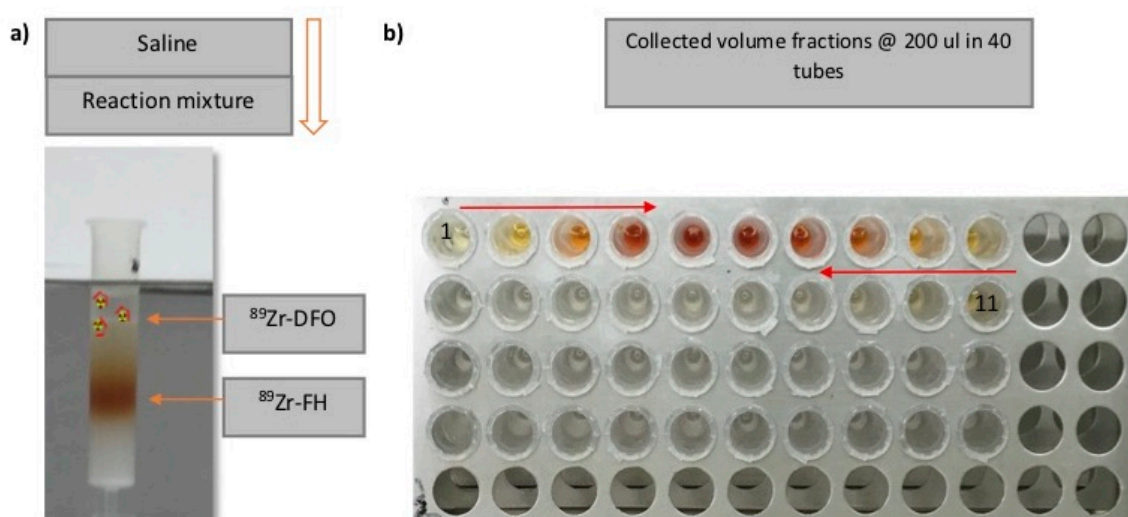

**Figure S2.** SEC using PD-10 analysis for [ $^{89}\text{Zr}$ ]Zr-FH. **a)** PD-10 column loaded with  $^{89}\text{Zr}$ -FH reaction mixture showing separation of [ $^{89}\text{Zr}$ ]Zr-DFO complex; **b)** eluted volume fractions (at 200  $\mu\text{L}$ ) from PD-10 elution.

**Abbreviations:** FH, Feraheme; DFO, deferoxamine mesylate salt.

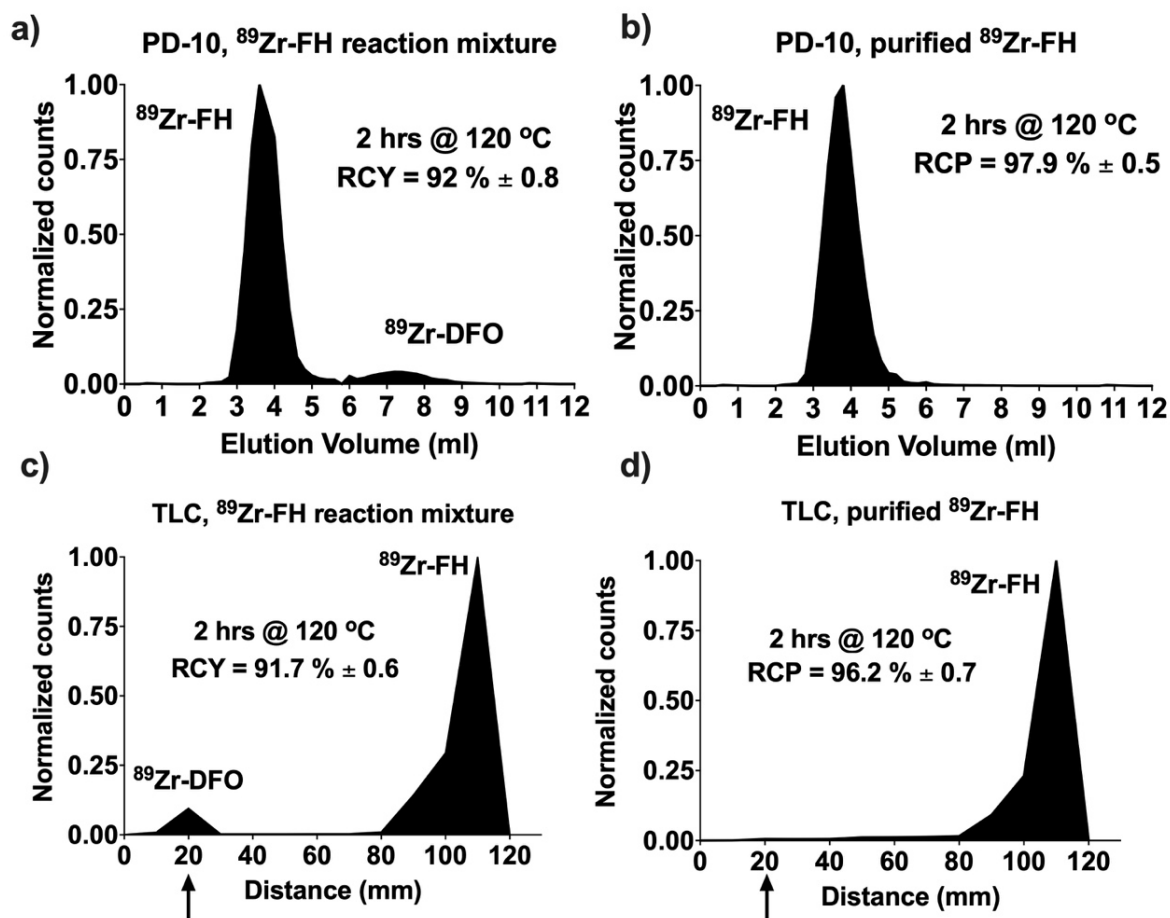

**Figure S3.** Radio-chemical analysis of [ $^{89}\text{Zr}$ ]Zr-FH radiolabeling. Decay corrected SEC (a,b) and radio-TLC chromatogram (c,d) activity profiles for reaction and purified products. The arrows show the origin on the radio-TLC plate.

**Notes:** Analytical radio-TLC and PD-10 elution (at 0.2 mL fractions) activity profiles for reaction and purified [ $^{89}\text{Zr}$ ]Zr-FH samples with calculated RCY and RCP. The first  $\approx$  2.3 mL volume was collected with no activity and the next 3mL ( $\approx$ 15 collected volumes) contained the [ $^{89}\text{Zr}$ ]Zr-FH; the [ $^{89}\text{Zr}$ ]Zr-DFO complex was collected at  $\approx$  5.3-10 mL.

**Abbreviations:** SEC, size exclusion chromatography; PD-10, polypropylene desalting 10 mL column; DFO, deferoxamine mesylate salt.
